# Supplementary material for: Prioritizing Emerging Zoonoses in The Netherlands
Source: PLoS One. 2010 Nov 15;5(11):e13965. doi: 10.1371/journal.pone.0013965 (PMC2981521; doi:10.1371/journal.pone.0013965)
Supplement: Annex S2 — Database. (0.06 MB XLS) [file pone.0013965.s002.xls]

## Sheet: Baseline model
		Criteria	C1	Introduction		%/year	C2	Transmission animals			%	C3	Econ. damage animals		m€/YEAR			Criteria	C4	Transm. Anim. -> hum.		%	C5	Transmission humans			%	C6	Morbidity		-	C7	Mortality			%
		Weight	0.418				0.292					0.337						Weight	0.626				0.339					0.181				0.643
		Value	0.5	5	50	100	0	0.005	0.05	0.5	10	0.5	5	50	500			Value	0.005	0.05	0.5	10	0	0.005	0.05	0.5	10	0.02	0.06	0.2	0.6	0	0.05	0.5	5	50
		Normalized value	0	0.435	0.869	1	0	0.386	0.528	0.671	0.857	0	0.303	0.606	0.909			Normalized value	0	0.233	0.465	0.767	0	0.386	0.528	0.671	0.857	0	0.281	0.589	0.869	0	0.528	0.671	0.814	0.957
Category	Family	Species														Category	Family	Species
Prions		BSE prion	0	0	1	1	1	0	0	0	0	0	0	0	1	Prions		BSE prion	1	0	0	0	1	0	0	0	0	0	0	0	1	0	0	0	0	1
Viruses	Arenaviridae	Lymphocytic choriomeningitis virus	0	0	1	0	0	0	0	1	1	1	0	0	0	Viruses	Arenaviridae	Lymphocytic choriomeningitis virus	1	0	0	0	1	0	0	0	0	0	0	1	0	0	0	1	0	0
Viruses	Bunyaviridae	Batai virus	0	0	1	0	0	1	1	1	0	1	1	0	0	Viruses	Bunyaviridae	Batai virus	1	1	1	0	1	0	0	0	0	1	1	0	0	1	0	0	0	0
Viruses	Bunyaviridae	Bhanja virus	0	0	1	0	0	1	1	1	0	1	1	0	0	Viruses	Bunyaviridae	Bhanja virus	1	1	1	0	1	0	0	0	0	1	0	0	0	1	0	0	0	0
Viruses	Bunyaviridae	California encephalitis virus	0	1	0	0	0	0	1	1	0	0	1	1	0	Viruses	Bunyaviridae	California encephalitis virus	1	1	1	0	1	0	0	0	0	0	0	0	1	0	0	1	0	0
Viruses	Bunyaviridae	Crimean-Congo hemorrhagic fever virus	0	0	1	0	1	1	0	0	0	1	0	0	0	Viruses	Bunyaviridae	Crimean-Congo hemorrhagic fever virus	0	1	1	0	1	0	0	0	0	0	0	0	1	0	0	0	0	1
Viruses	Bunyaviridae	Dobrava-Belgrade virus	0	0	1	0	0	0	0	1	1	1	1	0	0	Viruses	Bunyaviridae	Dobrava-Belgrade virus	1	1	0	0	1	0	0	0	0	0	0	0	1	0	0	0	1	0
Viruses	Bunyaviridae	Erve virus	0	0	1	0	1	1	1	1	1	1	1	0	0	Viruses	Bunyaviridae	Erve virus	1	1	1	0	1	0	0	0	0	0	1	0	0	1	0	0	0	0
Viruses	Bunyaviridae	Puumala virus	0	0	0	1	0	0	0	1	1	1	1	0	0	Viruses	Bunyaviridae	Puumala virus	1	1	0	0	1	0	0	0	0	0	1	0	0	0	0	1	0	0
Viruses	Bunyaviridae	Rift Valley fever virus	0	1	0	0	0	0	0	1	1	0	0	0	1	Viruses	Bunyaviridae	Rift Valley fever virus	1	1	0	0	0	1	0	0	0	0	0	1	0	0	1	0	0	0
Viruses	Bunyaviridae	Seoul virus	0	0	1	0	0	0	0	1	1	1	1	0	0	Viruses	Bunyaviridae	Seoul virus	1	0	0	0	1	0	0	0	0	0	0	1	0	0	0	0	1	0
Viruses	Bunyaviridae	Tahyna virus	0	0	1	0	0	1	1	1	0	1	1	0	0	Viruses	Bunyaviridae	Tahyna virus	1	1	1	1	1	0	0	0	0	0	1	1	0	1	0	0	0	0
Viruses	Flaviviridae	Japanese encephalitis virus	0	1	0	0	0	0	1	1	0	0	0	0	1	Viruses	Flaviviridae	Japanese encephalitis virus	1	1	1	0	1	0	0	0	0	0	0	0	1	0	0	0	0	1
Viruses	Flaviviridae	Louping ill virus	0	0	1	0	0	1	1	1	0	0	0	1	1	Viruses	Flaviviridae	Louping ill virus	1	0	0	0	1	0	0	0	0	0	1	0	0	1	1	1	0	0
Viruses	Flaviviridae	Rocio virus	1	0	0	0	1	1	1	1	1	1	1	0	0	Viruses	Flaviviridae	Rocio virus	1	1	1	0	1	0	0	0	0	0	0	1	1	0	1	1	1	1
Viruses	Flaviviridae	Saint Louis encephalitis virus	1	1	0	0	0	0	1	1	0	0	1	0	0	Viruses	Flaviviridae	Saint Louis encephalitis virus	1	1	1	0	1	0	0	0	0	0	0	1	0	0	0	0	1	1
Viruses	Flaviviridae	Tick-borne encephalitis virus	0	0	1	0	0	0	1	1	0	1	0	0	0	Viruses	Flaviviridae	Tick-borne encephalitis virus	1	1	1	0	1	0	0	0	0	0	1	1	0	0	0	0	1	0
Viruses	Flaviviridae	Wesselsbron virus	1	0	0	0	0	1	1	1	0	1	1	0	0	Viruses	Flaviviridae	Wesselsbron virus	0	1	1	0	1	0	0	0	0	0	1	0	0	1	0	0	0	0
Viruses	Flaviviridae	West Nile virus	0	0	1	0	0	0	0	1	1	0	1	0	0	Viruses	Flaviviridae	West Nile virus	0	1	1	0	1	0	0	0	0	0	1	1	0	0	0	1	0	0
Viruses	Hepeviridae	Hepatitis E virus	0	0	0	1	0	0	0	1	1	1	0	0	0	Viruses	Hepeviridae	Hepatitis E virus	1	0	0	0	1	0	0	0	0	0	1	0	0	0	0	0	1	0
Viruses	Orthomyxoviridae	Dhori virus (Batken virus)	1	0	0	0	1	1	1	1	0	1	1	0	0	Viruses	Orthomyxoviridae	Dhori virus (Batken virus)	1	1	1	0	1	0	0	0	0	0	1	1	0	1	0	0	0	0
Viruses	Orthomyxoviridae	Influenza A virus (avian) H5N1	0	0	1	0	0	0	0	1	1	0	0	0	1	Viruses	Orthomyxoviridae	Influenza A virus (avian) H5N1	1	1	0	0	1	1	0	0	0	0	1	0	0	0	0	0	0	1
Viruses	Orthomyxoviridae	Thogotovirus	1	0	0	0	0	1	1	1	0	1	1	0	0	Viruses	Orthomyxoviridae	Thogotovirus	1	1	1	0	1	0	0	0	0	0	1	1	0	1	1	0	0	0
Viruses	Picornaviridae	Ljungan virus	0	0	1	0	0	0	1	1	0	1	0	0	0	Viruses	Picornaviridae	Ljungan virus	1	1	1	0	1	0	0	0	0	0	1	0	0	1	1	0	0	0
Viruses	Poxviridae	Cowpox virus	0	0	0	1	0	0	0	1	0	0	1	0	0	Viruses	Poxviridae	Cowpox virus	1	1	0	0	0	1	0	0	0	0	1	0	0	1	0	0	0	0
Viruses	Poxviridae	Monkeypox virus	0	1	0	0	0	0	0	1	0	0	1	0	0	Viruses	Poxviridae	Monkeypox virus	1	0	0	0	0	1	0	0	0	0	1	0	0	0	0	1	1	0
Viruses	Poxviridae	Orf virus	0	0	0	1	0	0	0	1	0	0	1	0	0	Viruses	Poxviridae	Orf virus	1	0	0	0	1	0	0	0	0	0	1	0	0	1	0	0	0	0
Viruses	Reoviridae	Colorado tick fever virus	0	1	0	0	0	1	1	1	0	0	1	0	0	Viruses	Reoviridae	Colorado tick fever virus	1	1	1	0	1	0	0	0	0	1	1	0	0	1	1	0	0	0
Viruses	Reoviridae	Eyach virus	0	0	1	1	0	1	1	1	0	1	1	0	0	Viruses	Reoviridae	Eyach virus	1	1	1	0	1	0	0	0	0	0	1	1	0	1	1	0	0	0
Viruses	Reoviridae	Tribec virus	0	0	1	0	0	1	1	1	0	1	1	0	0	Viruses	Reoviridae	Tribec virus	1	1	1	0	1	0	0	0	0	0	0	0	1	1	0	0	0	0
Viruses	Rhabdoviridae	Rabies virus (classic )	0	0	1	0	0	0	0	1	1	0	1	0	0	Viruses	Rhabdoviridae	Rabies virus (classic )	1	1	0	0	1	0	0	0	0	1	0	0	0	0	0	0	0	1
Viruses	Rhabdoviridae	European bat lyssa virus	0	0	0	1	0	0	0	1	1	1	0	0	0	Viruses	Rhabdoviridae	European bat lyssa virus	1	0	0	0	1	0	0	0	0	1	0	0	0	0	0	0	0	1
Viruses	Togaviridae	Barmah Forest virus	1	1	0	0	0	1	1	1	0	1	1	0	0	Viruses	Togaviridae	Barmah Forest virus	1	1	1	0	1	0	0	0	0	0	0	1	0	1	0	0	0	0
Viruses	Togaviridae	Eastern equine encephalitis virus	0	1	0	0	0	0	1	1	0	0	1	0	0	Viruses	Togaviridae	Eastern equine encephalitis virus	1	1	0	0	1	0	0	0	0	0	0	0	1	0	0	0	0	1
Viruses	Togaviridae	Ross river virus	1	1	0	0	0	1	1	1	0	1	0	0	0	Viruses	Togaviridae	Ross river virus	1	1	1	0	1	0	0	0	0	0	1	1	0	1	0	0	0	0
Viruses	Togaviridae	Sindbis virus	0	0	1	0	0	1	1	1	0	1	0	0	0	Viruses	Togaviridae	Sindbis virus	1	1	1	0	1	0	0	0	0	0	1	0	0	1	0	0	0	0
Viruses	Togaviridae	Venezuelan equine encephalitis virus	0	1	0	0	0	1	1	1	0	0	1	0	0	Viruses	Togaviridae	Venezuelan equine encephalitis virus	1	0	0	0	1	0	0	0	0	0	0	1	0	1	1	1	0	0
Viruses	Togaviridae	Western equine encephalitis virus	0	1	0	0	0	1	1	1	0	0	1	0	0	Viruses	Togaviridae	Western equine encephalitis virus	1	0	0	0	1	0	0	0	0	0	0	1	1	0	0	0	1	0
Bacteria	Anaplasmataceae	Ehrlichia chaffeensis	1	1	0	0	1	1	1	0	0	1	0	0	0	Bacteria	Anaplasmataceae	Ehrlichia chaffeensis	1	0	0	0	1	0	0	0	0	1	1	0	0	0	0	0	1	0
Bacteria	Bartonellaceae	Bartonella henselae	0	0	0	1	0	0	0	0	1	1	1	0	0	Bacteria	Bartonellaceae	Bartonella henselae	0	1	0	0	1	0	0	0	0	1	1	1	0	0	1	0	0	0
Bacteria	Brucellaceae	Brucella melitensis	0	0	1	0	0	0	0	0	1	0	0	1	0	Bacteria	Brucellaceae	Brucella melitensis	1	0	0	0	1	0	0	0	0	0	1	0	0	0	1	1	0	0
Bacteria	Brucellaceae	Brucella suis	0	0	1	0	0	0	0	1	1	0	0	1	0	Bacteria	Brucellaceae	Brucella suis	1	0	0	0	1	0	0	0	0	0	1	0	0	0	1	1	0	0
Bacteria	Burkholderiaceae	Burkholderia mallei	1	0	0	0	0	1	1	1	0	1	0	0	0	Bacteria	Burkholderiaceae	Burkholderia mallei	1	0	0	0	1	0	0	0	0	0	0	1	0	0	0	1	0	0
Bacteria	Campylobacteraceae	Campylobacter spp.	0	0	0	1	0	0	0	0	1	0	1	0	0	Bacteria	Campylobacteraceae	Campylobacter spp.	0	0	1	0	0	1	0	0	0	1	0	0	0	0	1	0	0	0
Bacteria	Chlamydiaceae	Chlamydophila abortus	0	0	0	1	0	0	0	0	1	0	1	0	0	Bacteria	Chlamydiaceae	Chlamydophila abortus	1	0	0	0	1	0	0	0	0	0	1	1	0	1	1	1	1	0
Bacteria	Chlamydiaceae	Chlamydophila psittaci	0	0	0	1	0	0	0	0	1	1	0	0	0	Bacteria	Chlamydiaceae	Chlamydophila psittaci	1	1	0	0	1	0	0	0	0	0	1	1	0	0	0	1	1	0
Bacteria	Clostridiaceae	Clostridium botulinum (toxins)	0	0	0	1	0	1	0	0	0	1	0	0	0	Bacteria	Clostridiaceae	Clostridium botulinum (toxins)	1	0	0	0	1	0	0	0	0	0	0	1	0	0	0	0	1	0
Bacteria	Clostridiaceae	Clostridium difficile	0	0	0	1	0	1	0	0	0	1	1	0	0	Bacteria	Clostridiaceae	Clostridium difficile	1	0	0	0	1	0	0	0	0	0	1	0	0	1	1	0	0	0
Bacteria	Coxiellaceae	Coxiella burnetii	0	0	0	1	0	0	0	1	1	0	0	1	0	Bacteria	Coxiellaceae	Coxiella burnetii	1	0	0	0	1	1	0	0	0	0	1	1	0	0	0	1	1	0
Bacteria	Ehrlichiaceae	Anaplasma phagocytophila	0	0	0	1	0	1	1	0	0	0	1	0	0	Bacteria	Ehrlichiaceae	Anaplasma phagocytophila	0	1	0	0	1	0	0	0	0	0	0	1	0	0	0	0	1	0
Bacteria	Enterobacteriaceae	Escheria coli Shiga toxin producing	0	0	0	1	0	0	0	1	0	1	0	0	0	Bacteria	Enterobacteriaceae	Escheria coli Shiga toxin producing	1	0	0	0	0	1	0	0	0	1	0	0	0	0	1	1	1	0
Bacteria	Enterobacteriaceae	Salmonella spp. (non-typhoidal)	0	0	0	1	0	0	0	1	0	0	1	0	0	Bacteria	Enterobacteriaceae	Salmonella spp. (non-typhoidal)	1	0	0	0	0	1	0	0	0	1	0	0	0	0	1	0	0	0
Bacteria	Enterobacteriaceae	Yersinia enterocolitica	0	0	0	1	0	0	1	1	0	0	1	0	0	Bacteria	Enterobacteriaceae	Yersinia enterocolitica	1	0	0	0	0	1	0	0	0	1	0	0	0	0	1	0	0	0
Bacteria	Enterobacteriaceae	Yersinia pestis	0	1	0	0	0	0	0	1	1	0	1	0	0	Bacteria	Enterobacteriaceae	Yersinia pestis	1	0	0	0	0	1	0	0	0	0	0	0	1	0	0	0	1	1
Bacteria	Erysipelothrichidae	Erysipelothrix rhusiopathiae	0	0	0	1	0	0	0	1	1	1	1	0	0	Bacteria	Erysipelothrichidae	Erysipelothrix rhusiopathiae	1	0	0	0	1	0	0	0	0	0	1	0	0	1	0	0	0	0
Bacteria	Flavobacteriaceae	Capnocytophaga canimorsus	0	0	0	1	0	0	0	0	1	1	0	0	0	Bacteria	Flavobacteriaceae	Capnocytophaga canimorsus	1	0	0	0	1	0	0	0	0	0	0	0	1	0	0	0	1	0
Bacteria	Francisellaceae	Francisella tularensis	0	0	1	0	0	0	0	1	1	0	1	0	0	Bacteria	Francisellaceae	Francisella tularensis	1	1	0	0	1	0	0	0	0	0	1	0	0	0	0	0	1	0
Bacteria	Leptospiraceae	Leptospira interrogans	0	0	0	1	0	0	0	1	0	0	1	0	0	Bacteria	Leptospiraceae	Leptospira interrogans	1	0	0	0	0	1	0	0	0	0	1	0	0	0	0	0	1	0
Bacteria	Mycobacteriaceae	Mycobacterium avium	0	0	0	1	0	0	1	0	0	0	1	0	0	Bacteria	Mycobacteriaceae	Mycobacterium avium	1	0	0	0	0	1	0	0	0	0	0	1	0	0	1	0	0	0
Bacteria	Mycobacteriaceae	Mycobacterium bovis	0	0	1	0	0	0	1	1	0	0	0	1	0	Bacteria	Mycobacteriaceae	Mycobacterium bovis	1	1	0	0	0	1	0	0	0	0	0	1	0	0	0	1	0	0
Bacteria	Pasteurellaceae	Pasteurella multocida	0	0	0	1	0	0	1	1	1	1	1	0	0	Bacteria	Pasteurellaceae	Pasteurella multocida	1	1	1	0	1	0	0	0	0	1	1	0	0	0	1	0	0	0
Bacteria	Rickettsiaceae	Rickettsia conorii	0	1	1	0	0	0	1	1	0	1	1	0	0	Bacteria	Rickettsiaceae	Rickettsia conorii	0	1	0	0	1	0	0	0	0	0	1	0	0	0	0	1	0	0
Bacteria	Rickettsiaceae	Rickettsia helvetica	0	0	0	1	0	0	1	1	0	1	1	0	0	Bacteria	Rickettsiaceae	Rickettsia helvetica	0	1	0	0	1	0	0	0	0	0	1	0	0	1	0	0	0	0
Bacteria	Rickettsiaceae	Rickettsia rickettsii	0	1	0	0	0	0	1	1	0	1	1	0	0	Bacteria	Rickettsiaceae	Rickettsia rickettsii	0	1	0	0	1	0	0	0	0	0	0	1	0	0	0	1	0	0
Bacteria	Rickettsiaceae	Rickettsia spp.	0	0	0	1	0	0	1	1	0	1	1	0	0	Bacteria	Rickettsiaceae	Rickettsia spp.	0	1	0	0	1	0	0	0	0	0	1	0	0	1	0	0	0	0
Bacteria	Spirochaetaceae	Borrelia spp.	0	0	0	1	0	0	1	0	0	1	0	0	0	Bacteria	Spirochaetaceae	Borrelia spp.	0	0	1	0	1	0	0	0	0	0	0	1	0	1	0	0	0	0
Bacteria	Staphylococcaceae	Staphylococcus aureus (meticilin resistant)	0	0	0	1	0	0	0	1	1	0	1	0	0	Bacteria	Staphylococcaceae	Staphylococcus aureus (meticilin resistant)	1	1	0	0	1	1	0	0	0	0	1	0	0	0	1	0	0	0
Bacteria	Streptococcaceae	Streptococcus suis	0	0	0	1	0	0	0	0	1	0	1	0	0	Bacteria	Streptococcaceae	Streptococcus suis	1	0	0	0	1	0	0	0	0	0	0	1	1	0	0	0	1	0
Fungi	Sporidiobolacea	Cryptococus neoformans var. neoformans	0	0	0	1	0	0	1	1	0	1	1	0	0	Fungi	Sporidiobolacea	Cryptococus neoformans var. neoformans	1	1	0	0	1	0	0	0	0	1	1	0	0	1	1	0	0	0
Fungi	Sporidiobolacea	Cryptococus neoformans var. gattii	0	0	0	1	0	0	1	1	0	1	1	0	0	Fungi	Sporidiobolacea	Cryptococus neoformans var. gattii	1	1	0	0	1	0	0	0	0	0	1	1	0	1	1	0	0	0
Protozoa	Babesiidae	Babesia divergens/ microti	0	0	0	1	0	0	1	1	0	1	0	0	0	Protozoa	Babesiidae	Babesia divergens/ microti	1	1	0	0	1	0	0	0	0	1	1	1	0	1	1	0	0	0
Protozoa	Cryptosporidiidae	Cryptosporidium parvum	0	0	0	1	0	0	0	1	1	0	1	1	0	Protozoa	Cryptosporidiidae	Cryptosporidium parvum	1	1	0	0	0	1	1	0	0	1	1	0	0	1	0	0	0	0
Protozoa	Diplomonadidae	Giardia lamblia	0	0	0	1	0	0	0	1	1	1	1	0	0	Protozoa	Diplomonadidae	Giardia lamblia	1	1	0	0	0	1	1	0	0	1	1	0	0	1	0	0	0	0
Protozoa	Sarcocystidae	Toxoplasma gondii	0	0	0	1	0	0	0	1	1	0	1	0	0	Protozoa	Sarcocystidae	Toxoplasma gondii	0	0	1	0	0	0	1	0	0	0	1	1	0	0	1	0	0	0
Protozoa	Trypanosomatidae	Leishmania spp.	0	0	1	0	0	1	1	0	0	0	1	0	0	Protozoa	Trypanosomatidae	Leishmania spp.	1	1	0	0	1	0	0	0	0	0	0	1	0	1	1	0	0	0
Helminths	Ascaridoidea	Anisakis simplex	0	0	0	1	0	0	0	1	1	0	1	0	0	Helminths	Ascaridoidea	Anisakis simplex	1	0	0	0	1	0	0	0	0	1	1	0	0	1	0	0	0	0
Helminths	Ascaridoidea	Ascaris suum	0	0	0	1	0	0	0	1	1	1	1	0	0	Helminths	Ascaridoidea	Ascaris suum	0	1	1	0	1	0	0	0	0	1	1	1	0	1	0	0	0	0
Helminths	Ascaridoidea	Baylisascaris procyonis	0	0	0	1	1	1	0	0	0	1	1	0	0	Helminths	Ascaridoidea	Baylisascaris procyonis	1	0	0	0	1	0	0	0	0	1	1	1	1	1	1	1	0	0
Helminths	Ascaridoidea	Toxocara canis/cati	0	0	0	1	0	0	0	1	1	1	1	0	0	Helminths	Ascaridoidea	Toxocara canis/cati	0	1	0	0	1	0	0	0	0	0	1	1	0	1	0	0	0	0
Helminths	Fasciolidae	Fasciola hepatica	0	0	0	1	0	0	1	1	0	0	1	0	0	Helminths	Fasciolidae	Fasciola hepatica	1	0	0	0	1	0	0	0	0	1	1	0	0	1	0	0	0	0
Helminths	Filarioidea	Dirofilaria immitis/repens	0	0	0	1	0	0	1	0	0	1	0	0	0	Helminths	Filarioidea	Dirofilaria immitis/repens	1	0	0	0	1	0	0	0	0	0	1	0	0	1	0	0	0	0
Helminths	Taeniidae	Echinococcus granulosus	0	0	0	1	0	1	0	0	0	1	1	0	0	Helminths	Taeniidae	Echinococcus granulosus	1	0	0	0	1	0	0	0	0	1	1	0	0	1	1	0	0	0
Helminths	Taeniidae	Echinococcus multilocularis	0	0	0	1	0	0	1	1	0	1	0	0	0	Helminths	Taeniidae	Echinococcus multilocularis	1	0	0	0	1	0	0	0	0	0	0	1	0	0	0	1	1	0
Helminths	Taeniidae	Taenia saginata	0	0	0	1	0	1	1	0	0	1	1	0	0	Helminths	Taeniidae	Taenia saginata	0	1	0	0	1	0	0	0	0	1	0	0	0	1	0	0	0	0
Helminths	Taeniidae	Taenia solium	1	1	0	0	1	0	0	0	0	1	0	0	0	Helminths	Taeniidae	Taenia solium	0	1	0	0	0	1	1	0	0	0	0	1	1	0	1	0	0	0
Helminths	Trichuroidea	Trichinella spp.	0	0	0	1	0	0	1	1	0	0	1	1	0	Helminths	Trichuroidea	Trichinella spp.	1	0	0	0	1	0	0	0	0	0	1	1	0	0	1	0	0	0
		High threat	0	0	0	1	0	0	0	0	1	0	0	0	1			High threat	0	0	0	1	0	0	0	0	1	0	0	0	1	0	0	0	0	1
		Low threat	1	0	0	0	1	0	0	0	0	1	0	0	0			Low threat	1	0	0	0	1	0	0	0	0	1	0	0	0	1	0	0	0	0
